# Supplementary material for: Pan-SHIP1/2 inhibitors promote microglia effector functions essential for CNS homeostasis
Source: Oxford University Press journal article supplement (doi:10.1242/jcs.238030), 2019-11-28
Supplement: jcs238030supp.pdf [file jcs238030supp.pdf]

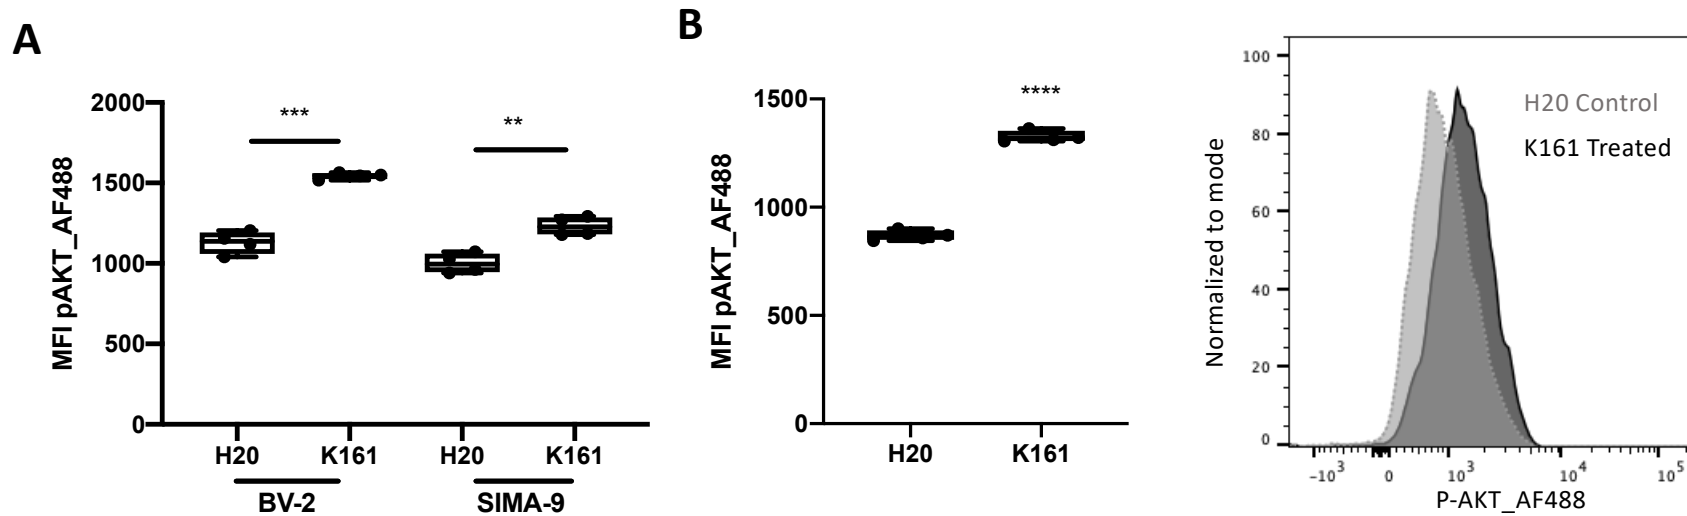

**Figure S1. Pan-SHIP1/2 Inhibition induces AKT phosphorylation on serine 473.** Box & whisker plots of p-AKT on (A) BV-2, SIMA-9 and (B) primary microglia with representative histogram for primary microglia K161 treated versus diluent control. Each plot is representative of three independent experiments and was analyzed with two-tailed T-test with Welch's correction (\*\* $p < 0.01$ , \*\*\* $p < 0.001$ , \*\*\*\* $p < 0.0001$ ).

| Compound   | Structure                                                                           | IC <sub>50</sub><br>SHIP1<br>( $\mu$ M) | IC <sub>50</sub><br>SHIP2<br>( $\mu$ M) | References                                 |
|------------|-------------------------------------------------------------------------------------|-----------------------------------------|-----------------------------------------|--------------------------------------------|
| 3AC (K100) | 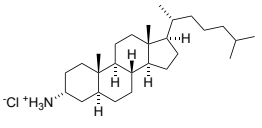   | 10                                      | ND                                      | (Brooks et al., 2010)                      |
| K116       |    | 1.5-6                                   | 6.5-13                                  | -                                          |
| K118       |    | 16                                      | 25                                      | (Srivastava, 2016, Gumbleton et al., 2017) |
| K149       |   | 20-30                                   | 30                                      | (Hoekstra et al., 2016)                    |
| K161       |  | 6                                       | 5-10                                    | -                                          |
| K185       |  | 18                                      | 30                                      | -                                          |
| AS1949490  |  | 13                                      | 0.6                                     | (Suwa et al., 2009)                        |

**Table S1: Relative IC<sub>50</sub> and structures of inhibitory compounds for SHIP1 and/or SHIP2 enzyme activity based on a fluorescence polarization assay.** ND, none detected (at 1mM by a Malachite Green assay of SHIP2 activity). (Brooks et al., 2010)
